# Supplementary material for: Probing glycosaminoglycan spectral signatures in live cells and their conditioned media by Raman microspectroscopy
Source: Royal Society of Chemistry journal article supplement (doi:10.1039/c6an01951j), 2017-01-01
Supplement: c6an01951j1.pdf [file c6an01951j1.pdf]

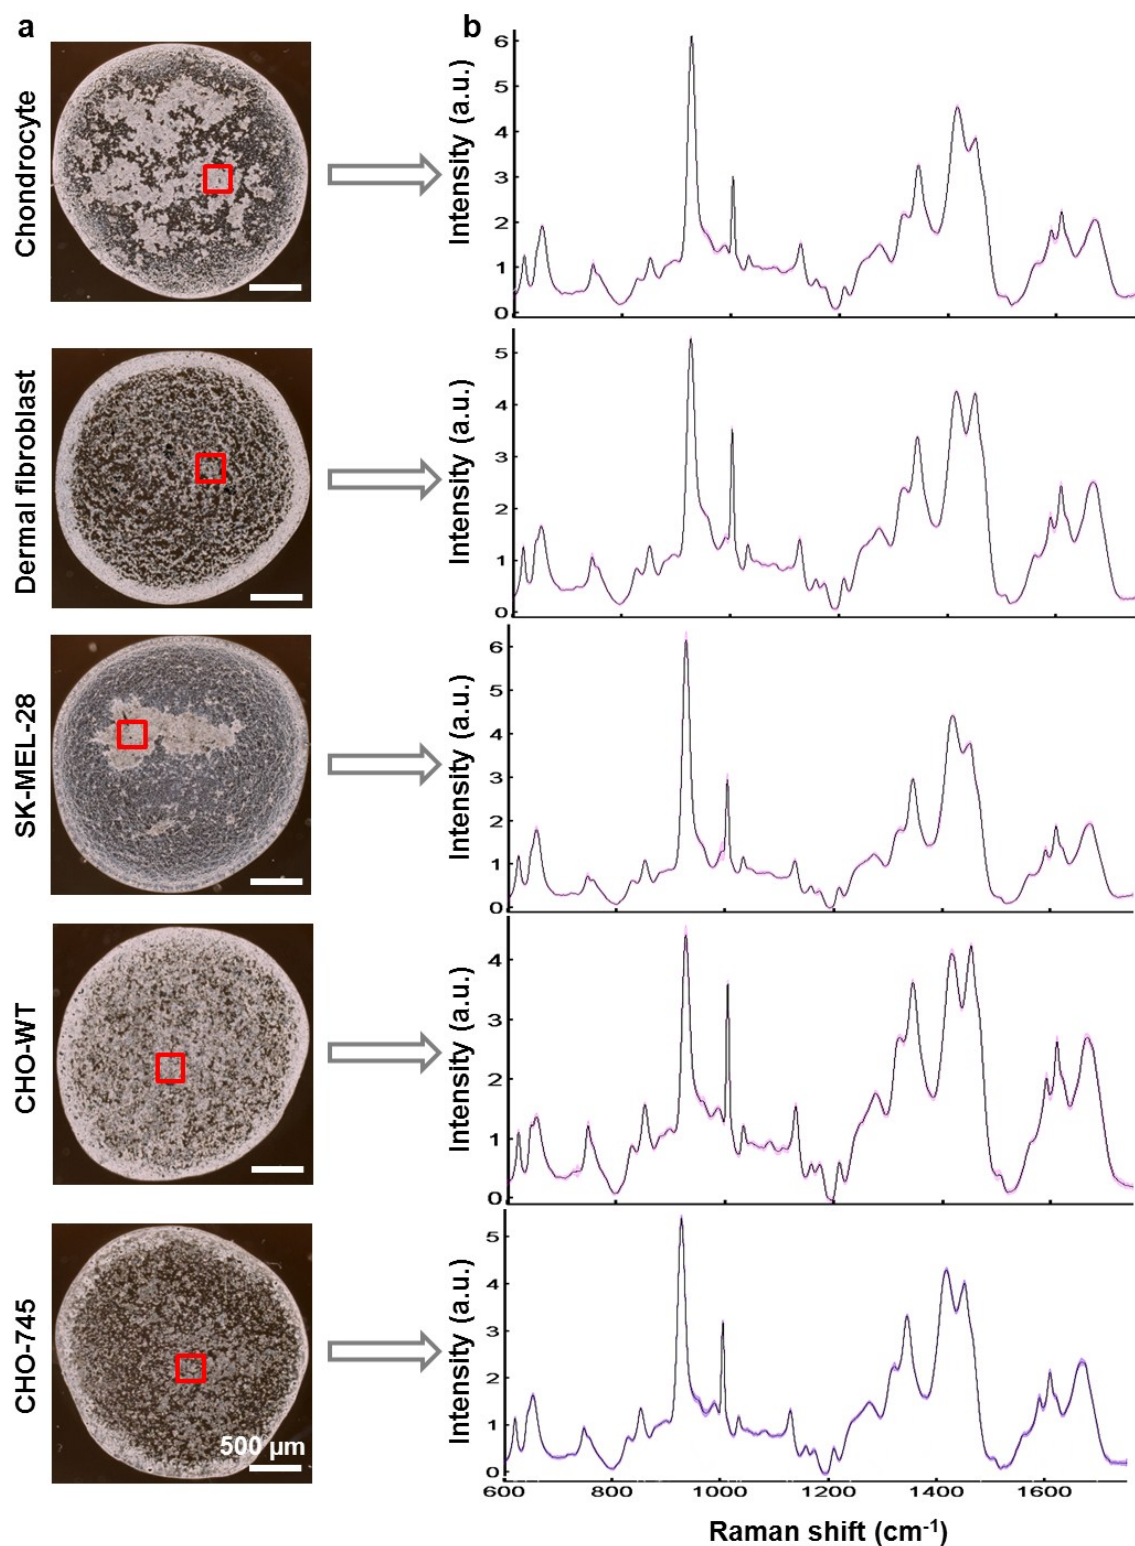

**ESC 1** Raman analysis of conditioned media. (a) White light images of conditioned media dried drops. Red rectangles indicate the area where acquisitions were taken. (b) Mean Raman spectrum and standard deviation of each conditioned medium.

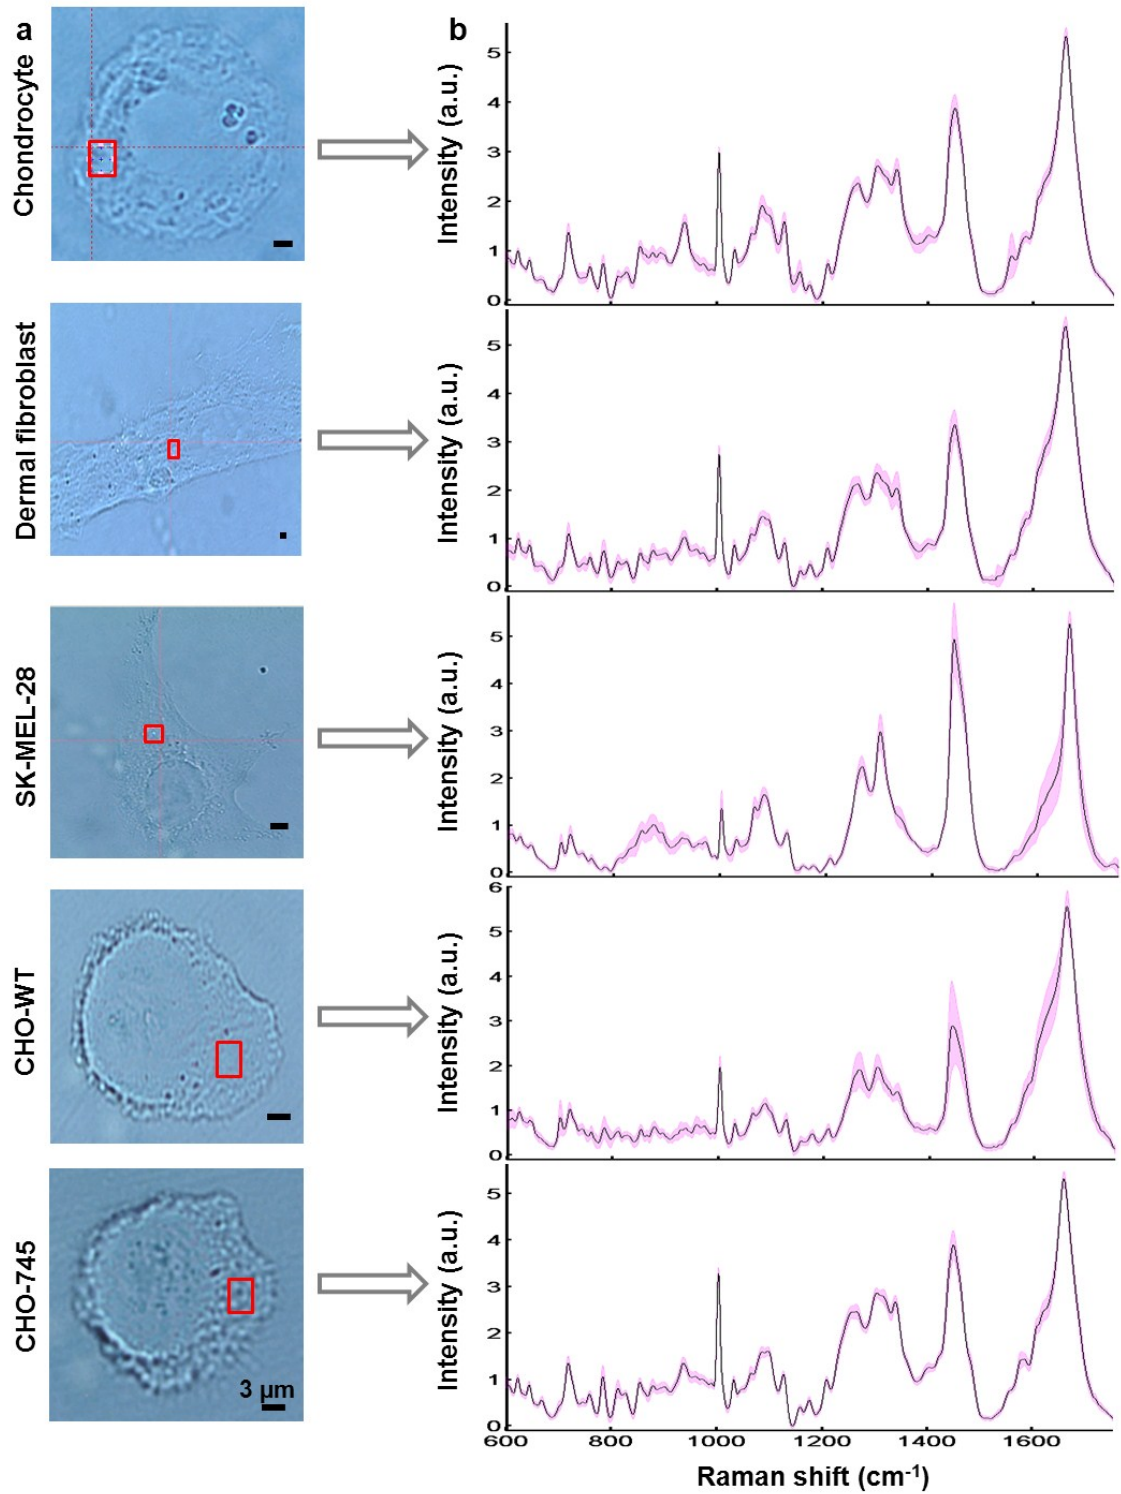

**ESC 2** Raman analysis of single live cells. (a) White light images of live cells. Red rectangles indicate the area of the cytoplasm where acquisitions were taken. (b) Mean Raman spectrum and standard deviation of each cell type.
